# Supplementary material for: Dual EGFR- and TfR-targeted gene transfer for sodium iodide symporter gene therapy of glioblastoma
Source: PubMed Central journal article supplement — Mol Ther Oncolytics. 2022 Nov 3;27:272–87. doi: 10.1016/j.omto.2022.10.013 (PMC9709165; doi:10.1016/j.omto.2022.10.013), 2022-11-03
Supplement: mmc1.pdf [file mmc1.pdf]

**Supplemental information**

**Dual EGFR- and TfR-targeted gene transfer  
for sodium iodide symporter  
gene therapy of glioblastoma**

**Rebekka Spellerberg, Teoman Benli-Hoppe, Carolin Kitzberger, Mara Hageneier, Nathalie Schwenk, Özgür Öztürk, Katja Steiger, Gabriele Multhoff, Matthias Eiber, Franz Schilling, Wolfgang A. Weber, Roland E. Kälin, Rainer Glass, Peter J. Nelson, Ernst Wagner, and Christine Spitzweg**

# Figure S1

## EGFR in TCGA GBM dataset

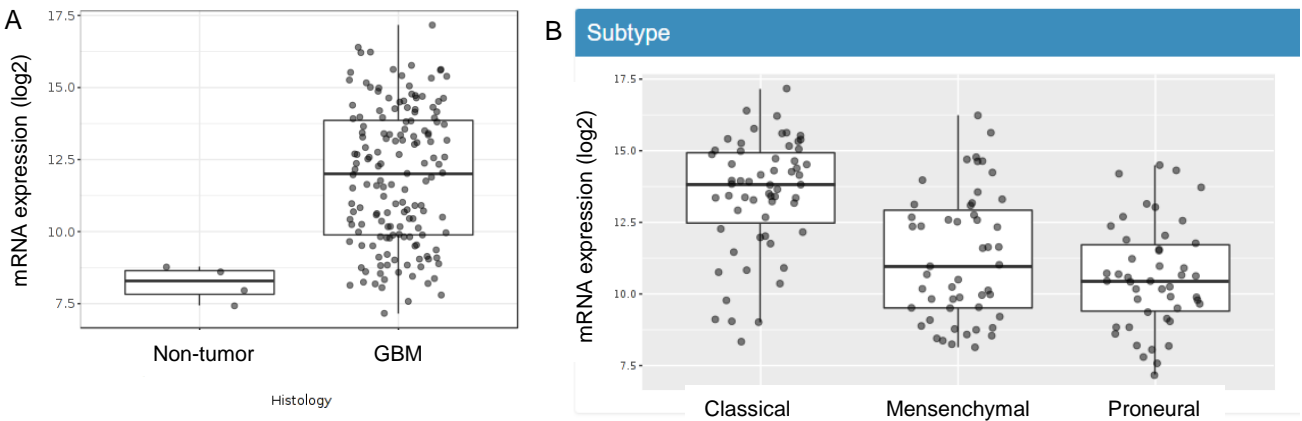

## TFR in TCGA GBM dataset

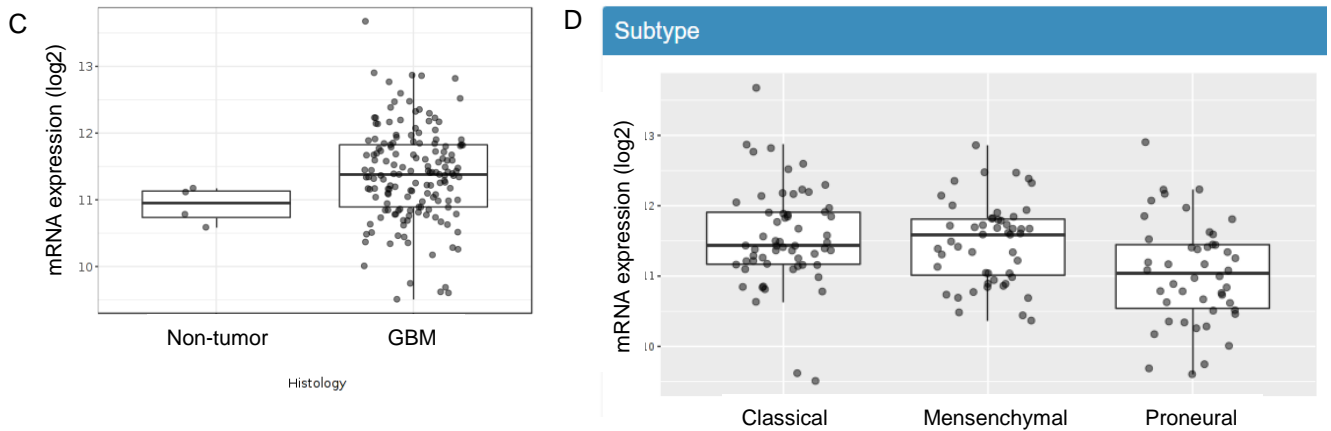

Figure S1: **The cancer genome atlas of glioblastoma.** EGFR and TFR expression levels from the adult TCGA-glioblastoma dataset were obtained by the GlioVis platform, compared to non-tumor brain tissue (A-B) and separated by GBM genetic subtype (proneural, classical and mesenchymal) (C-D). The data are based on the RNA-Seq platform and plotted for mRNA expression.
